# Supplementary material for: Allostatic Load Indices With Cholesterol and Triglycerides Predict Disease and Mortality Risk in Zoo-Housed Western Lowland Gorillas (Gorilla gorilla gorilla)
Source: PubMed Central journal article supplement — Biomark Insights. 2020 May 3;15:1177271920914585. doi: 10.1177/1177271920914585 (PMC7218307; doi:10.1177/1177271920914585), 2020-05-03
Supplement: Final_Edes_et_al_ALIs_with_lipids_supplement_02122020_xyz343751ef94532.pdf [file Final_Edes_et_al_ALIs_with_lipids_supplement_02122020_xyz343751ef94532.pdf]

1 **Supplement**

2           For some biomarkers, physiological dysregulation is bidirectional, such as cortisol<sup>79-82</sup>  
3 and total cholesterol.<sup>83-93</sup> Reflecting this bidirectional dysregulation, the multi-method approach  
4 in this report uses a two-tailed split quartile (top and bottom 12.5%) for these two biomarkers.  
5 However, we also tested ALIs with a one-tailed quartile for total cholesterol, as this is the  
6 traditional approach in human clinical research. Results between these ALIs (Table S1) and those  
7 presented in the main text for all-cause morbidity, cardiac disease, and mortality risk are  
8 consistent and lead to the same conclusions. For biomarkers such as cortisol and total  
9 cholesterol, we suggest testing ALIs using both one-tailed and two-tailed quartiles to determine  
10 which works best for the biomarker in question and for the outcomes of interest.

11

12 **Table S1** – Risk of all-cause morbidity, cardiac disease, and mortality in western lowland gorillas (n = 60) as predicted by multi-  
 13 model ALIs using a one-tailed quartile for total cholesterol. Risk was analyzed using binomial generalized linear models (GLMs) with  
 14 logit links for each allostatic load index.  
 15

| ALI                        | Allostatic Load |      |           | p      | Age  |           | p      | Sex   |            | AICc |
|----------------------------|-----------------|------|-----------|--------|------|-----------|--------|-------|------------|------|
|                            | p               | OR   | 95% CI    |        | OR   | 95% CI    |        | OR    | 95% CI     |      |
| <b>All-cause morbidity</b> |                 |      |           |        |      |           |        |       |            |      |
| <b>PS1 ALM</b>             | 0.061           | 1.35 | 1.00-1.90 |        |      |           |        |       |            | 81.9 |
|                            | 0.334           | 1.23 | 0.82-1.93 | 0.0009 | 1.15 | 1.07-1.26 | 0.002  | 10.57 | 2.63-54.99 | 59.4 |
| <b>PS2 ALM</b>             | 0.253           | 1.22 | 0.88-1.77 |        |      |           |        |       |            | 84.3 |
|                            | 0.718           | 0.92 | 0.57-1.45 | 0.0003 | 1.16 | 1.08-1.27 | 0.002  | 9.88  | 2.51-49.90 | 60.2 |
| <b>Cardiac disease</b>     |                 |      |           |        |      |           |        |       |            |      |
| <b>PS1 ALM</b>             | 0.241           | 1.19 | 0.89-1.28 |        |      |           |        |       |            | 85.4 |
|                            | 0.295           | 1.21 | 0.85-1.77 | 0.122  | 1.04 | 0.99-1.10 | 0.0004 | 11.23 | 3.25-48.87 | 72.5 |
| <b>PS2 ALM</b>             | 0.797           | 0.96 | 0.68-1.33 |        |      |           |        |       |            | 86.7 |
|                            | 0.217           | 0.76 | 0.48-1.15 | 0.025  | 1.06 | 1.01-1.13 | 0.0003 | 11.42 | 3.32-48.66 | 72.0 |
| <b>Mortality risk</b>      |                 |      |           |        |      |           |        |       |            |      |
| <b>PS1 ALM</b>             | 0.056           | 1.37 | 1.00-1.93 |        |      |           |        |       |            | 76.7 |
|                            | 0.315           | 1.20 | 0.84-1.72 | 0.023  | 1.06 | 1.01-1.12 |        |       |            | 73.2 |
| <b>PS2 ALM</b>             | 0.023           | 1.54 | 1.08-2.31 |        |      |           |        |       |            | 74.9 |
|                            | 0.141           | 1.35 | 0.91-2.07 | 0.030  | 1.06 | 1.01-1.11 |        |       |            | 72.0 |

16 Reference groups: all-cause morbidity and cardiac disease, 1=affected, mortality, 1=deceased; sex, male. AICc – Akaike’s information  
17 criterion, adjusted for small sample size; ALI – allostatic load index; ALM – multi-method approach, allostatic load estimated using  
18 primarily one-tailed quartiles but also some two-tailed split quartiles (top and bottom 12.5%), depending on the biomarker (e.g.,  
19 cortisol); PS1 – pooled sample 1, allostatic load estimated at each zoo independently prior to pooling the sample; PS2 – pooled  
20 sample 2, allostatic load estimated after pooling biomarkers from all locations
